# Supplementary material for: Coordination polymers and supramolecular cages based on [(MS4)Cux]x−2 cluster units and N-containing ligands
Source: Royal Society of Chemistry journal article supplement (doi:10.1039/d4ce00493k), 2024-01-01
Supplement: d4ce00493k1.pdf [file d4ce00493k1.pdf]

## Supplementary Information

# Coordination polymers and supramolecular cages based on $[(MS_4)Cu_x]^{x-2}$ cluster units and N-containing ligands

Meng-Yuan Xu,<sup>a</sup> Wu Qian,<sup>a</sup> Chen Wang,<sup>a</sup> Yao Sun,<sup>a</sup> Yu-Kang Teng,<sup>a</sup> Rui Zhang,<sup>b</sup> Zhen-Zhong Lu<sup>\*a</sup>

<sup>a</sup> Key Laboratory of Flexible Electronics (KLOFE) & Institute of Advanced Materials (IAM), Nanjing Tech University, 30 South Puzhu Road, Nanjing 211800, China.

<sup>b</sup> School of Chemistry and Chemical Engineering, Suzhou university, Education Park, Suzhou, Anhui, 234000, China.

Synthesis of ligands *dia* (9,10-di(1H-imidazol-1-yl)anthracene),

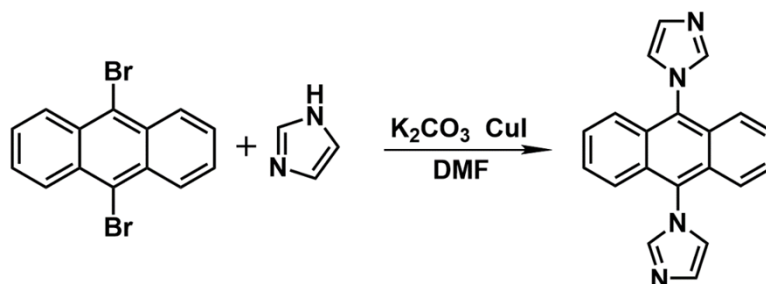

Ligand *dia* were synthesized following reported procedures.<sup>1</sup>

$^1H$  NMR ( $CDCl_3$ )  $\delta$  8.33 (t,  $J = 1.7$  Hz, 2H), 8.18 (dd,  $J = 5.2, 3.2$  Hz, 4H), 7.90 (dd,  $J = 3.8, J = 1.6$  Hz, 2H), 7.64 (dd,  $J = 3.8, 1.6$  Hz, 2H), 7.46 (dd,  $J = 5.3, 3.2$  Hz, 4H).

Synthesis of ligands *dip* (1,6-di(1H-imidazol-1-yl)pyrene),

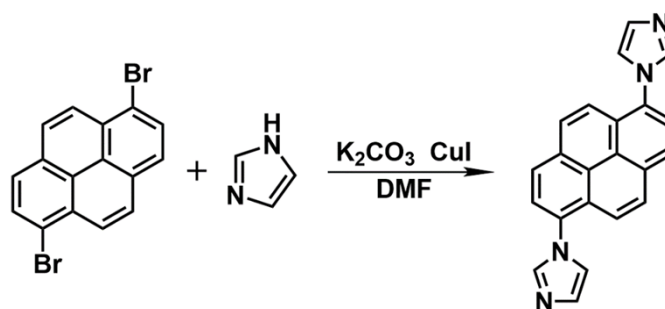

Ligand *dip* were synthesized following reported procedures.<sup>1</sup>

$^1H$  NMR ( $CDCl_3$ )  $\delta$  8.37 (t,  $J = 1.7$  Hz, 2H), 8.09 (d,  $J = 7.7$  Hz, 2H), 8.05 (m, br, 1H), 7.93 (dd,  $J = 3.8, 1.7$  Hz, 2H), 7.86 (dd,  $J = 7.7, 0.8$  Hz, 2H), 7.79 (d,  $J = 6.8$  Hz, 2H), 7.63 (dd,  $J = 3.8, 1.6$  Hz, 2H).

Synthesis of ligands *bmd* (1,1',1''-(benzene-1,3,5-triyltris(methylene))tris(1,4-diazabicyclo[2.2.2]octan-1-ium) bromide),

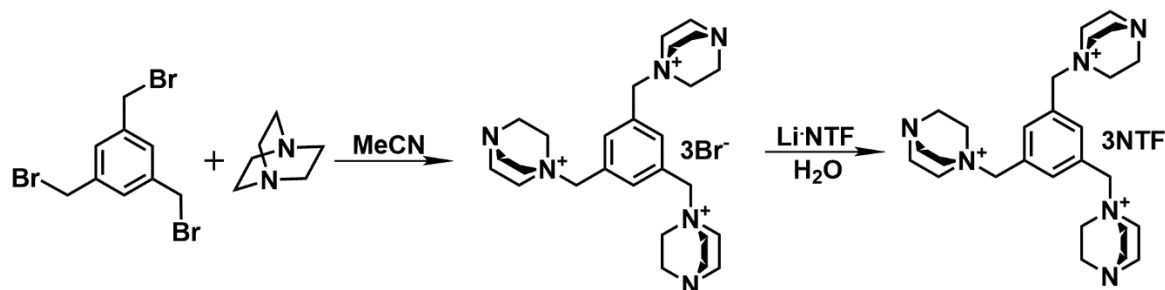

Ligand *bmd*· $NTF_3$  were synthesized following reported procedures.<sup>2</sup>

$^1H$  NMR ( $D_2O$ )  $\delta$  7.83 (s, 3H), 4.62 (s, 6H), 3.54 (t,  $J = 7.5$  Hz, 18H), 3.17 (t,  $J = 7.5$  Hz, 18H).

Synthesis of ligands *mbmd* (1,1',1''-((2,4,6-trimethylbenzene-1,3,5-triyl)tris(methylene))tris(1,4-diazabicyclo[2.2.2]octan-1-ium)),

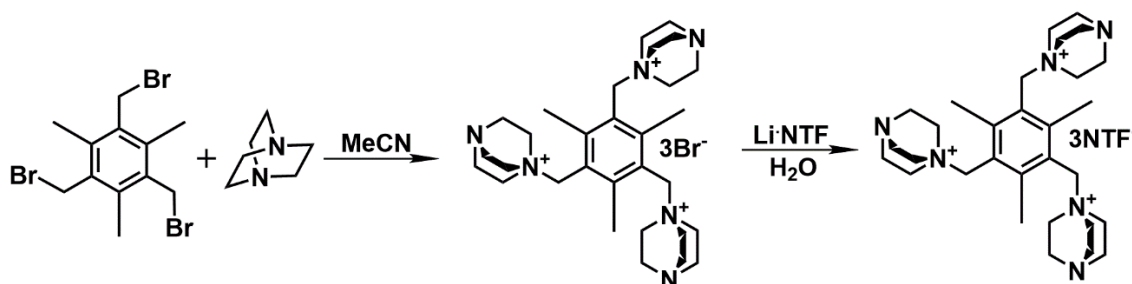

Ligand *mbmd*·*NTF*<sub>3</sub> were synthesized following reported procedures.<sup>2</sup>

<sup>1</sup>H NMR (D<sub>2</sub>O)  $\delta$  4.88 (d, *J* = 2.6 Hz, 6H), 3.68 (m, br, 18H), 3.22 (m, br, 18H), 2.63 (d, *J* = 2.6 Hz, 9H).

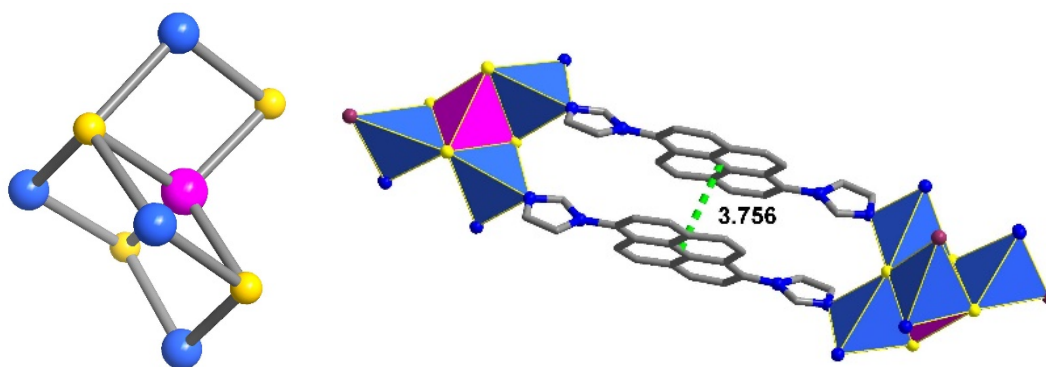

Figure S1. The penta-nuclear  $[WS_4Cu_4]^{2+}$  unit and twinning arrangement of *dip* ligands in **1**. (C grey, N blue, Cu light blue, W pink, S yellow, I purple)

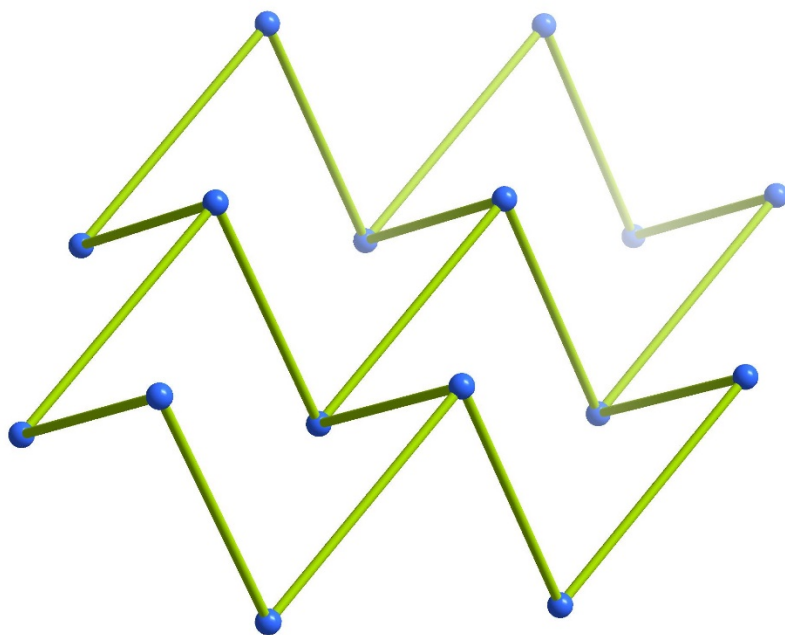

Figure S2. The schematic view of the layer structure in **1** with the penta-nuclear  $[\text{WS}_4\text{Cu}_4]^{2+}$  unit showing as blue balls and dip twin ligands as green sticks.

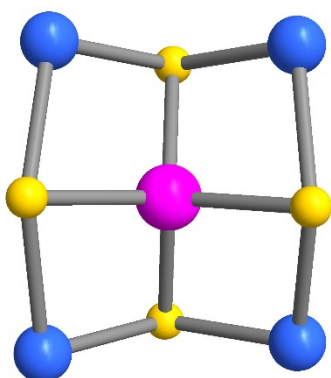

Figure S3. The penta-nuclear  $[(\text{WS}_4)\text{Cu}_4]^{2+}$  unit in **2**.

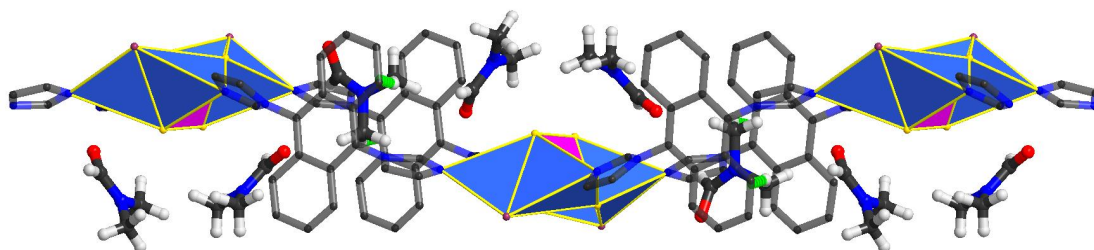

Figure S4. The zigzag  $[(\text{WS}_4\text{Cu}_4)\text{I}_2(\text{dia})_2]_n$  chain and chain of DMF in **2**.

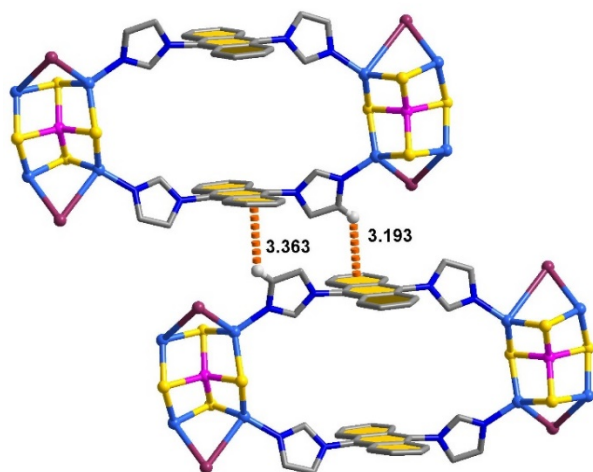

Figure S5. The C–H··· $\pi$  interaction between *dia* ligands of adjacent zigzag chains in **2**.

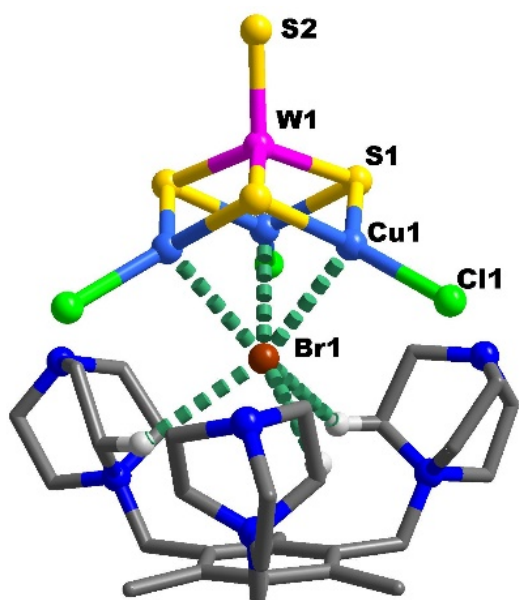

Figure S6. The crystal structure of **7**. (C grey, H light grey, N blue, Cu light blue, W pink, S yellow, Cl green, Br brown).

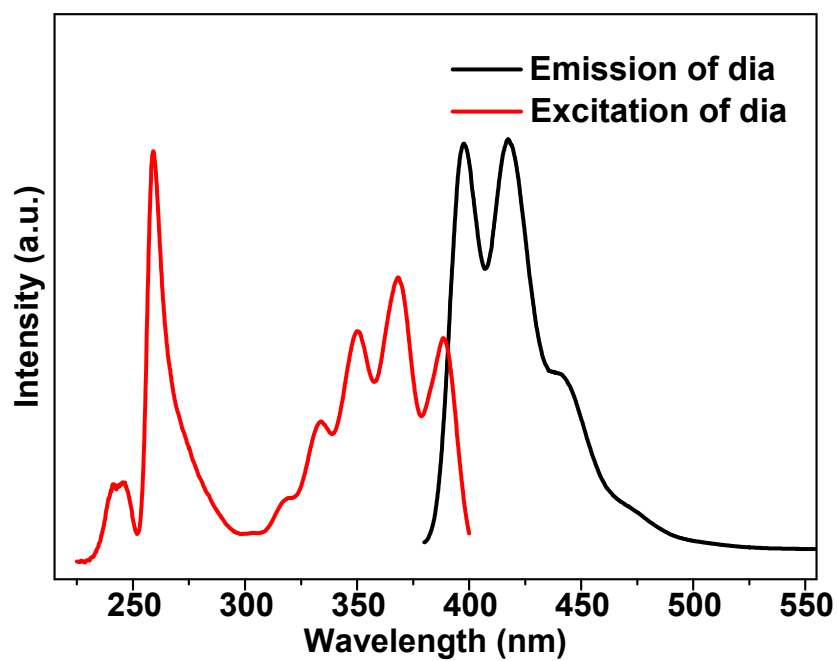

FigureS7. Fluorescent spectra for *dia* ligand in dilute DMF solution at room temperature.

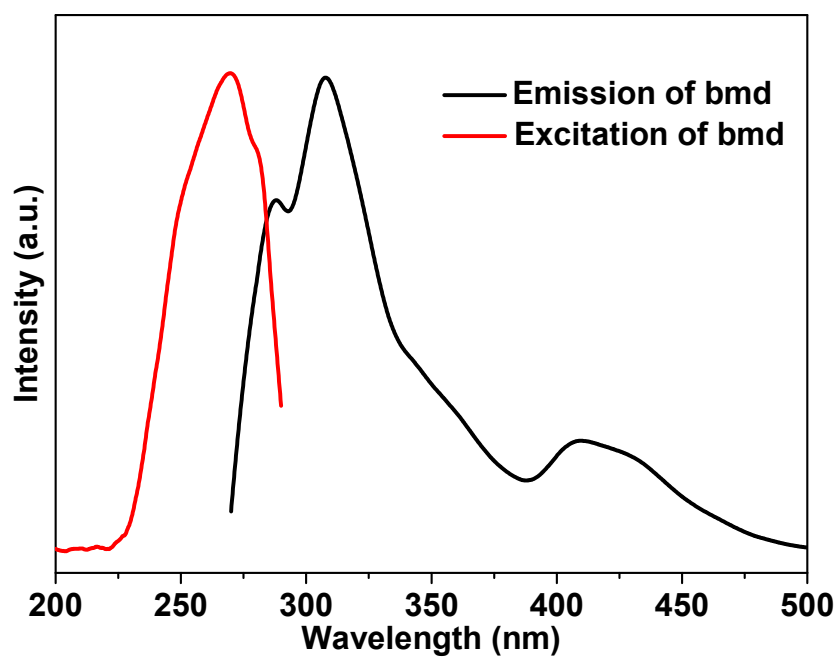

Figure S8. Fluorescent spectra for *bmd* ligand in dilute EtOH solution at room temperature.

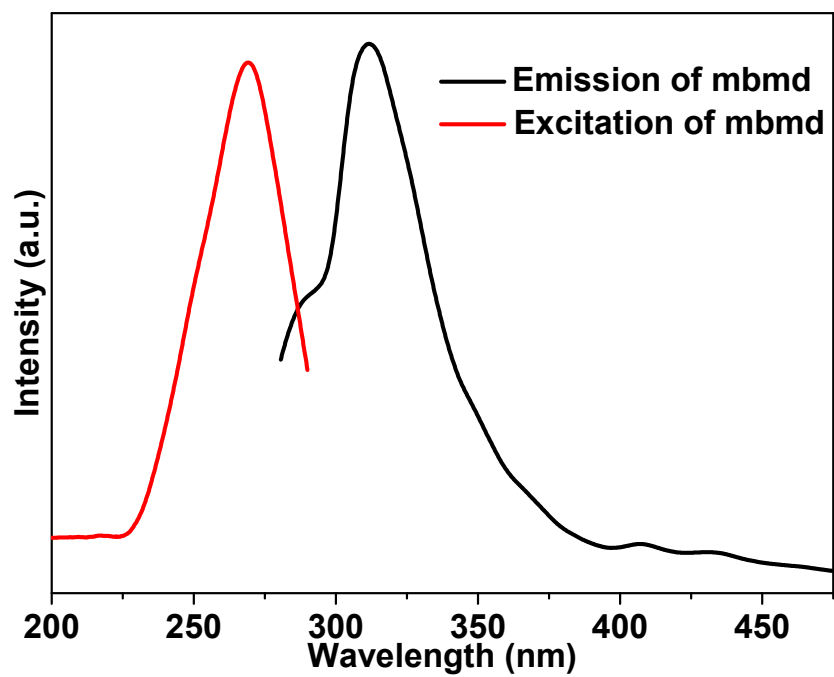

Figure S9. Fluorescent spectra for *mbmd* ligand in dilute EtOH solution at room temperature.

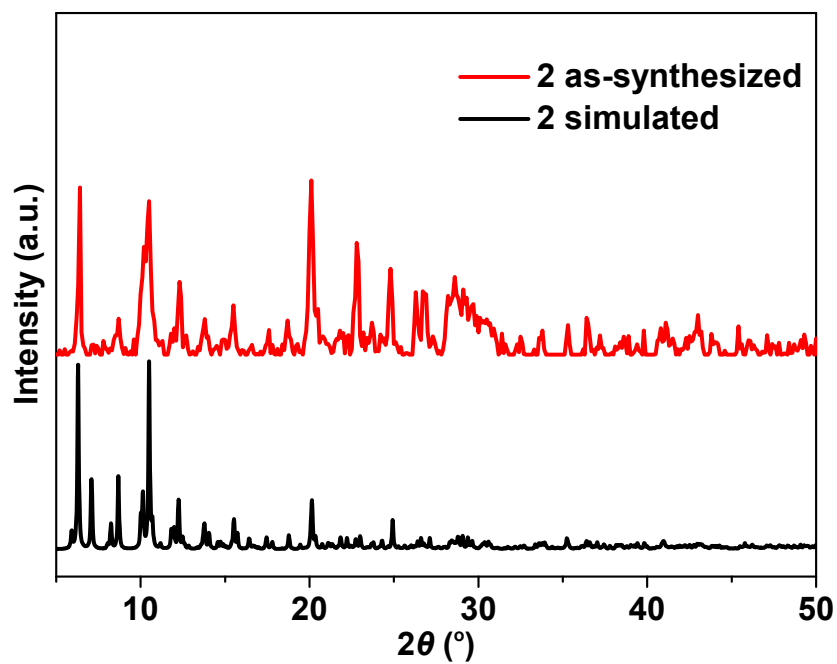

Figure S10. Powder XRD patterns for **2**.

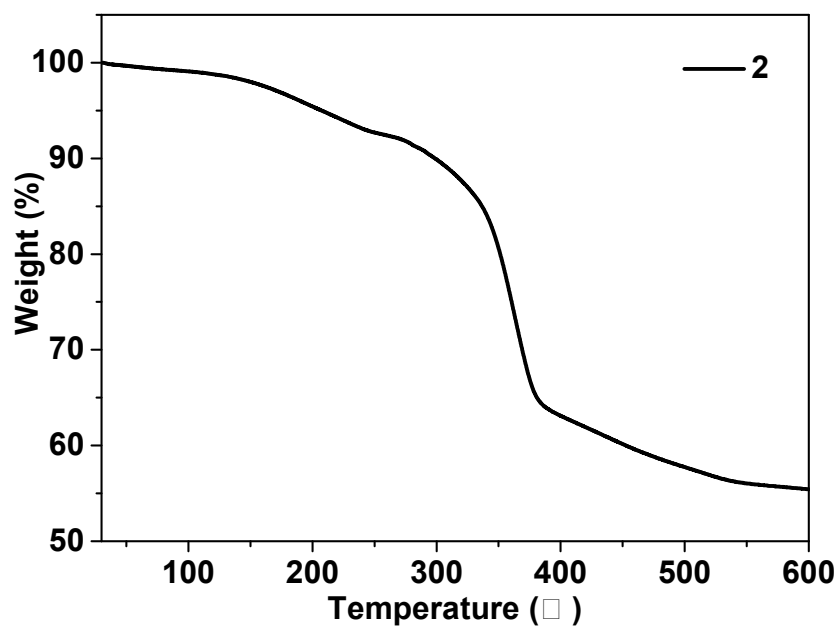

Figure S11. TG profile for 2.

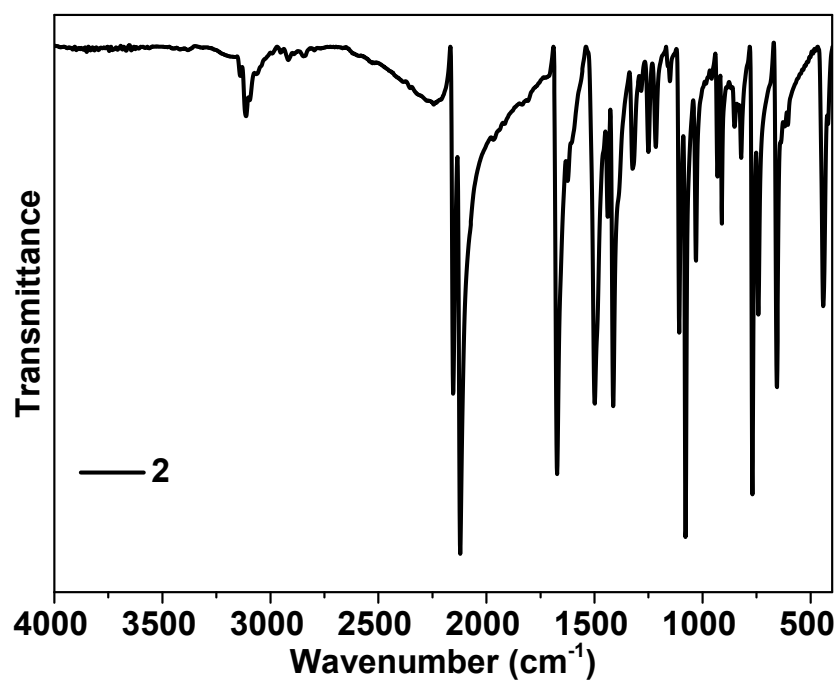

Figure S12. IR profile for 2.



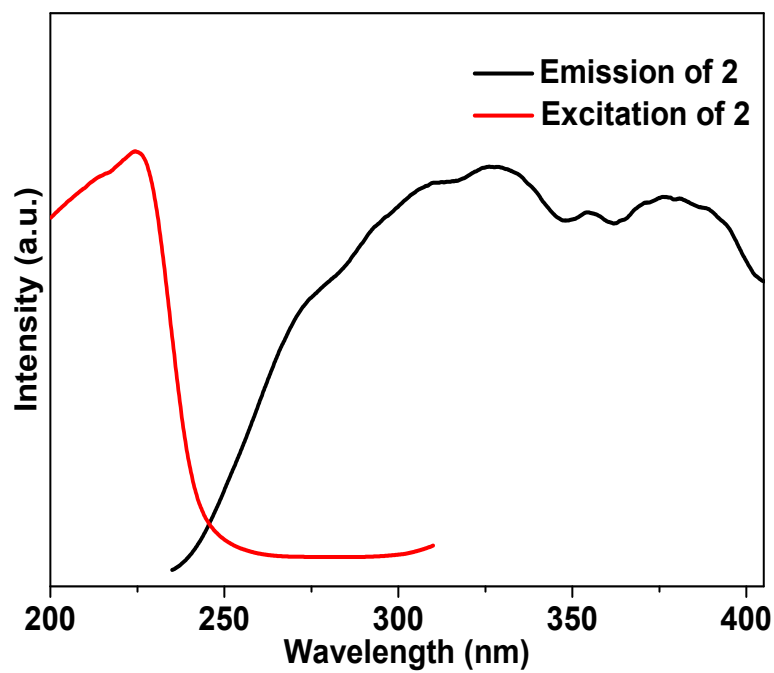

Figure S13. Fluorescent spectra for 2 in solid state at room temperature.

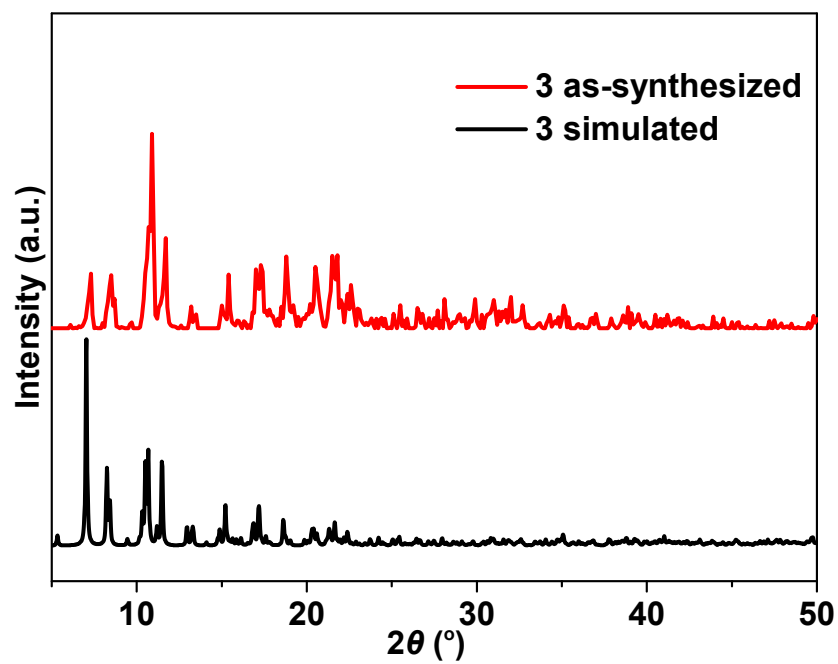

Figure S14. Powder XRD patterns for 3.

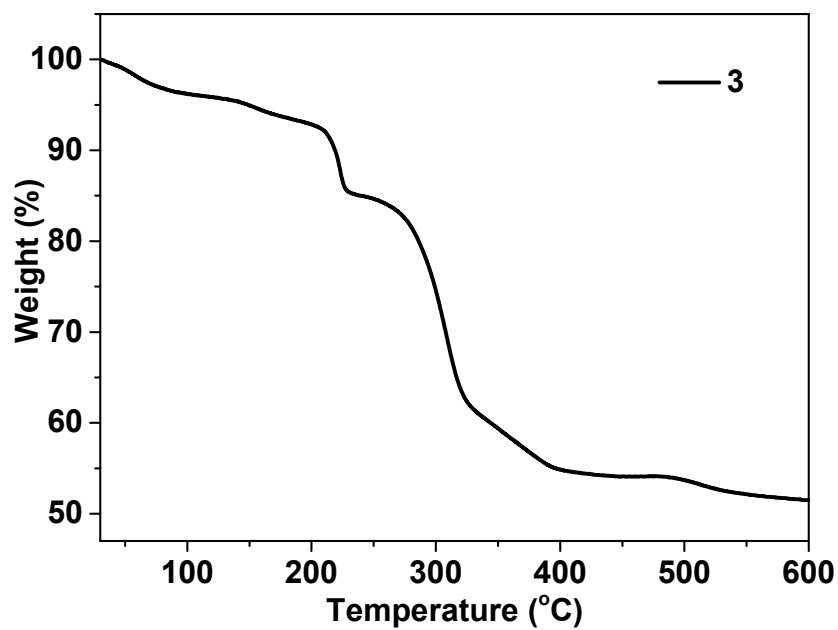

Figure S15. TG profile for 3.

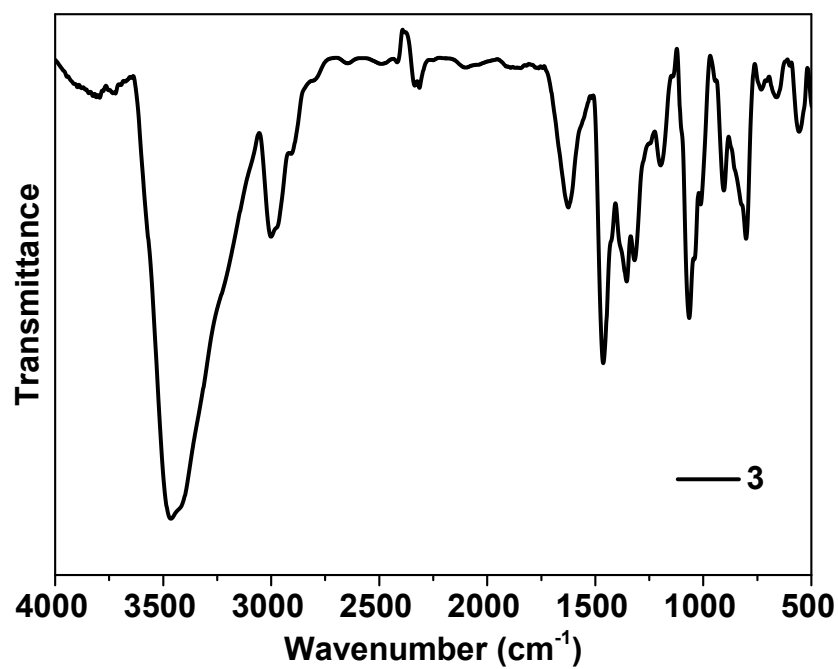

Figure S16. IR profile for 3.

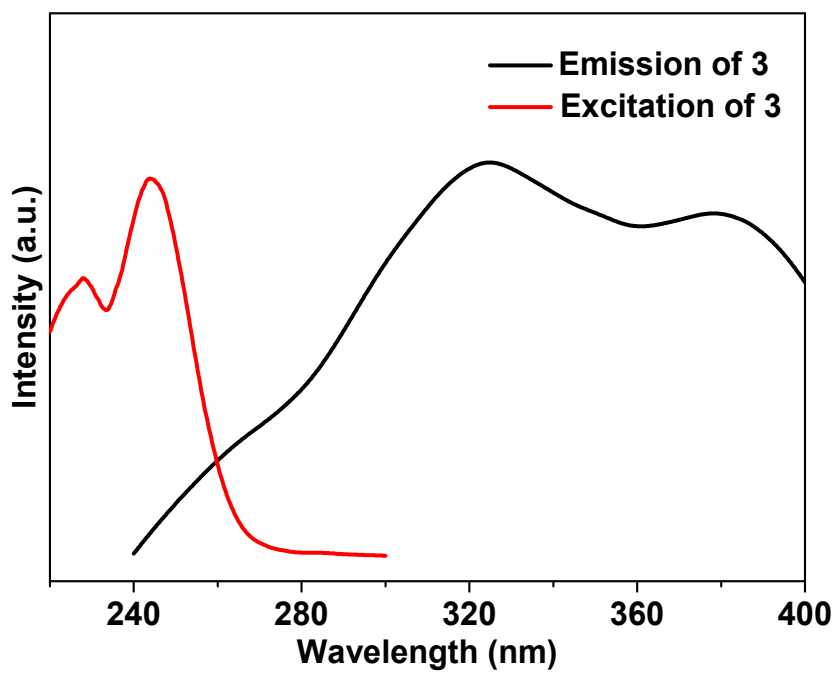

Figure S17. Fluorescent spectra for **3** in solid state at room temperature.

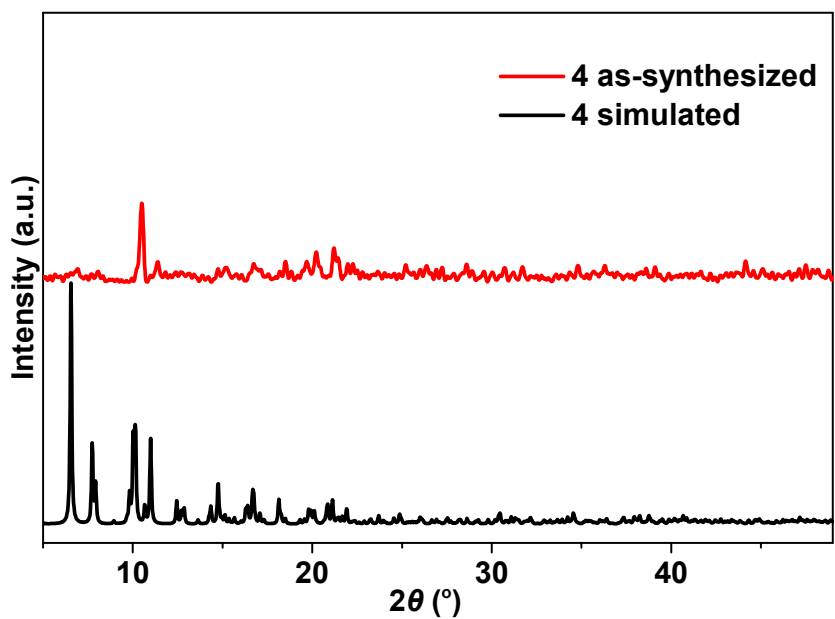

Figure S18. Powder XRD patterns for **4**. (The PXRD patterns for as-synthesized **4** did not match the simulated ones, probably because **4** were not stable in air.)

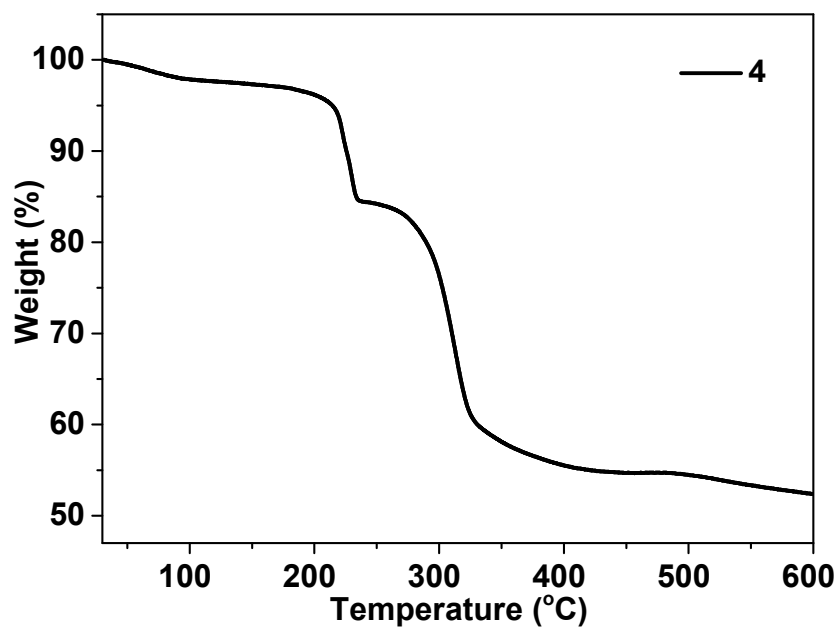

Figure S19. TG profile for 4.

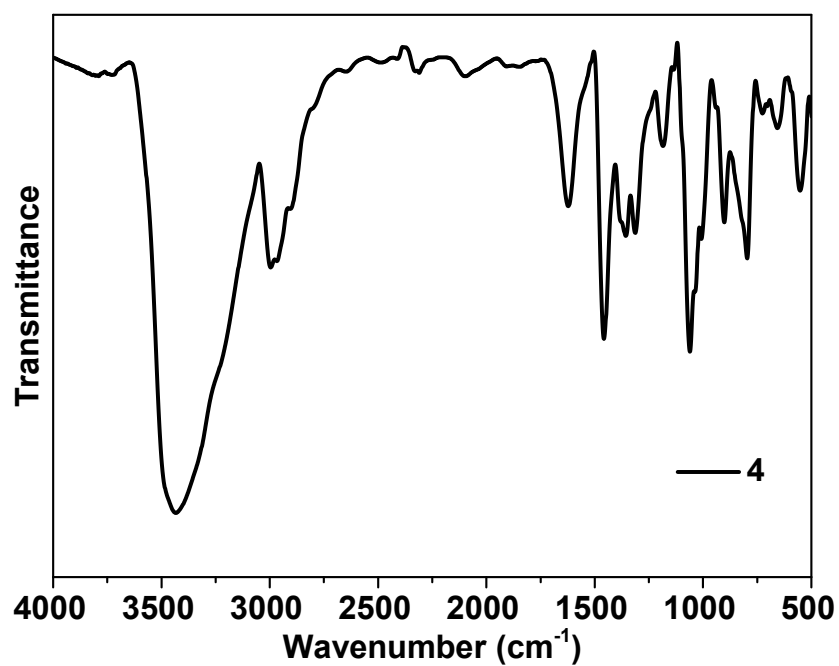

Figure S20. IR profile for 4.

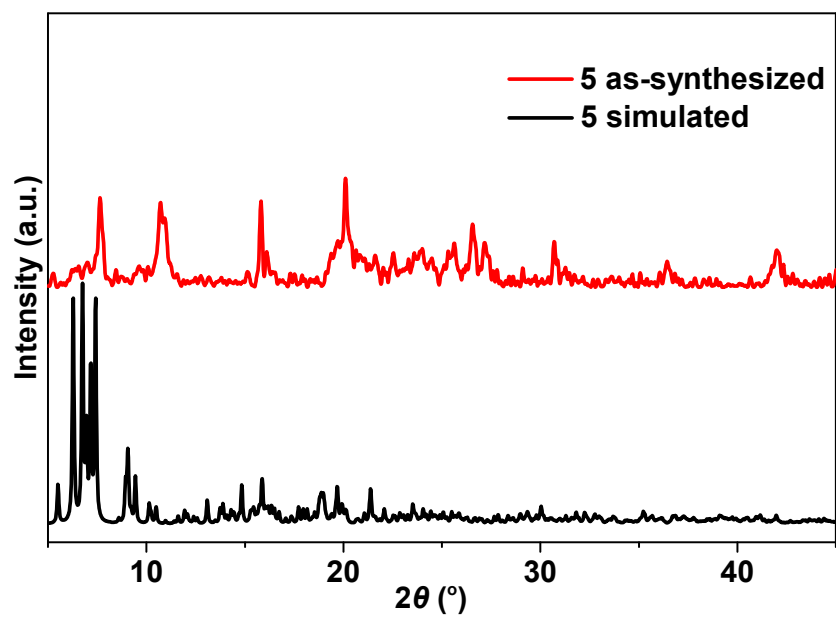

Figure S21. Powder XRD patterns for **5**. (The PXRD patterns for as-synthesized **5** did not match the simulated ones, probably because **5** were not stable in air.)

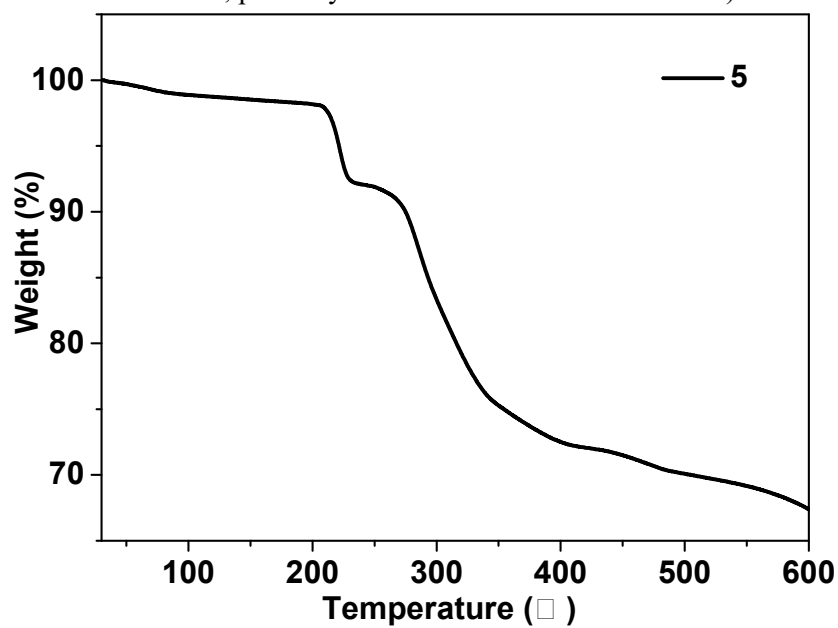

Figure S22. TG profile for **5**.

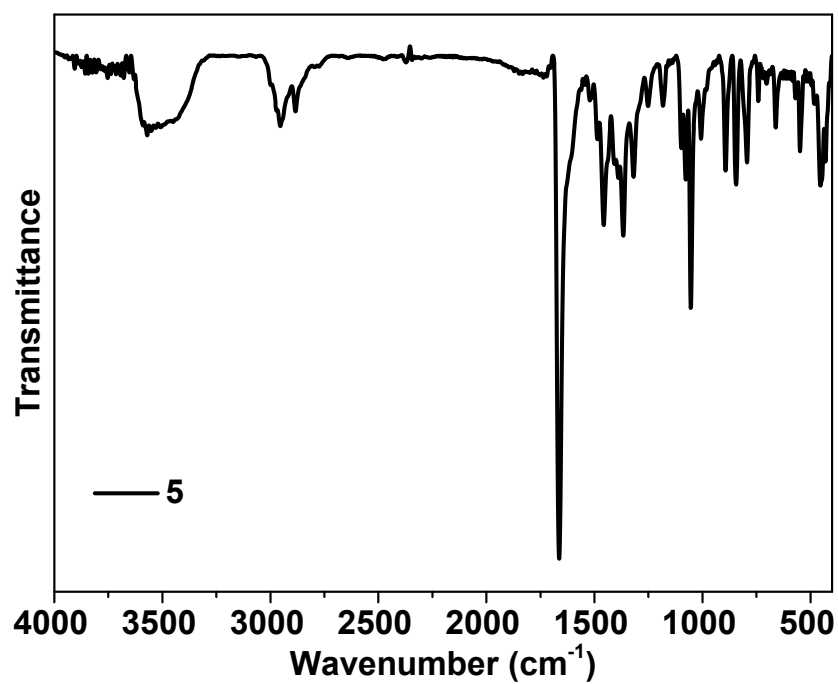

Figure S23. IR profile for 5.

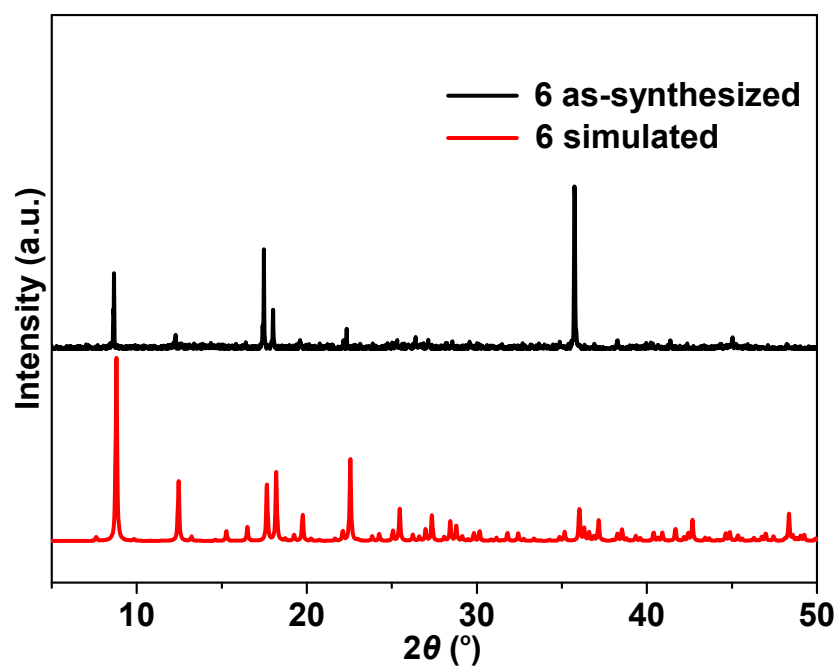

Figure S24. Powder XRD patterns for 6.

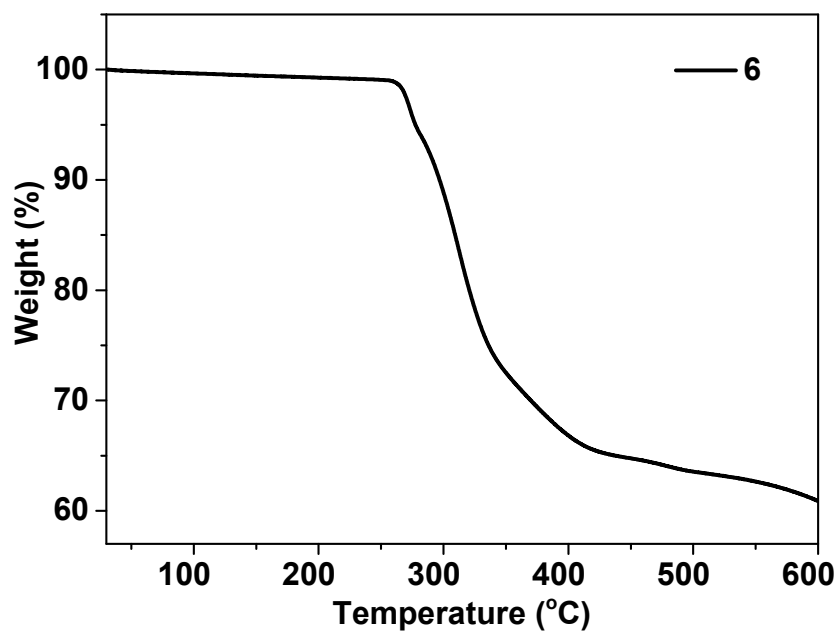

Figure S25. TG profile for 6.

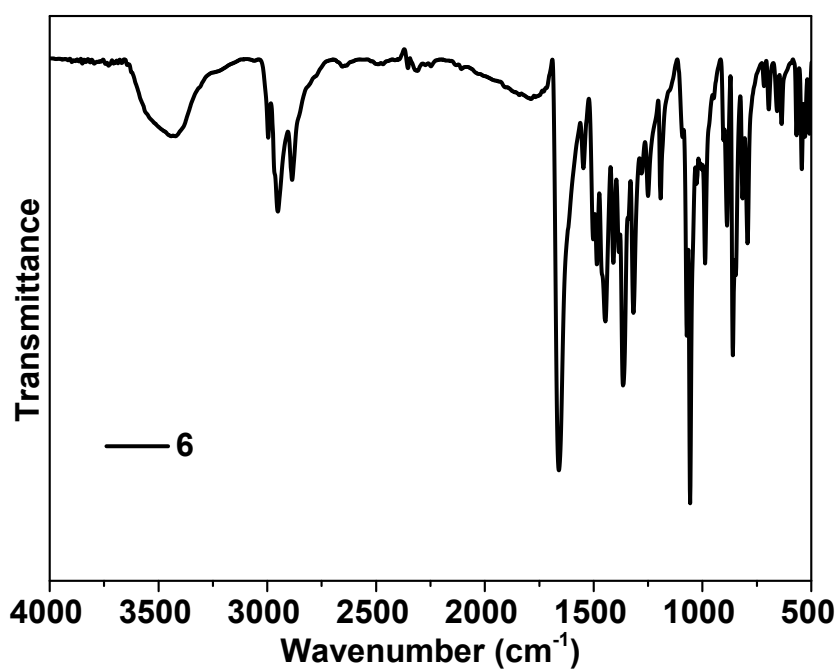

Figure S26. IR profile for 6.

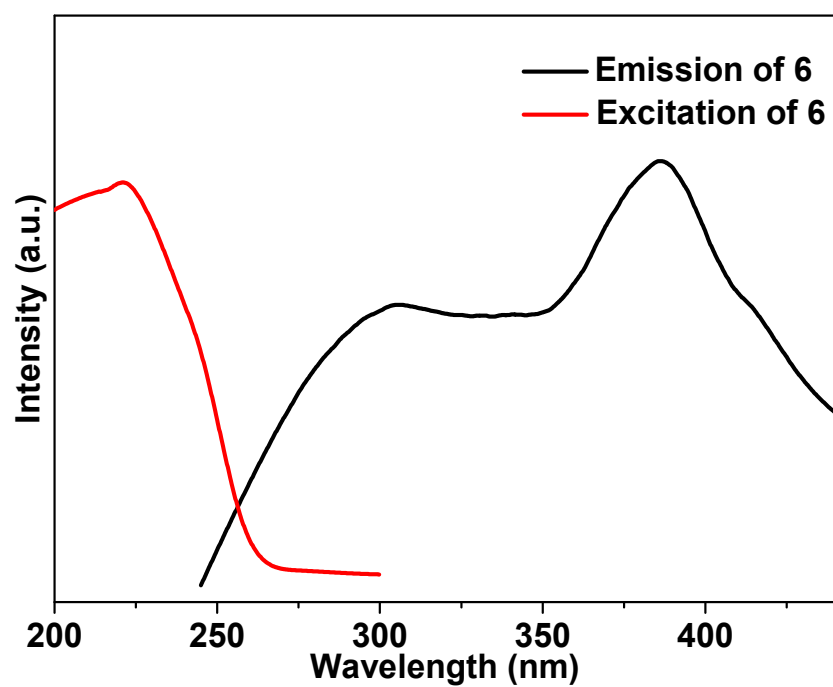

Figure S27. Fluorescent spectra for 6 in solid state at room temperature.

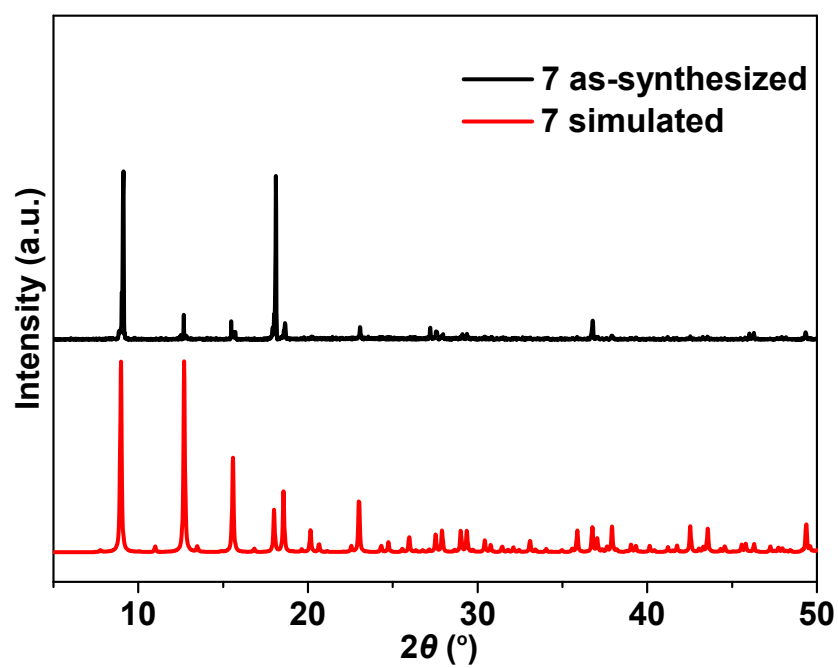

Figure S28. Powder XRD patterns for 7.



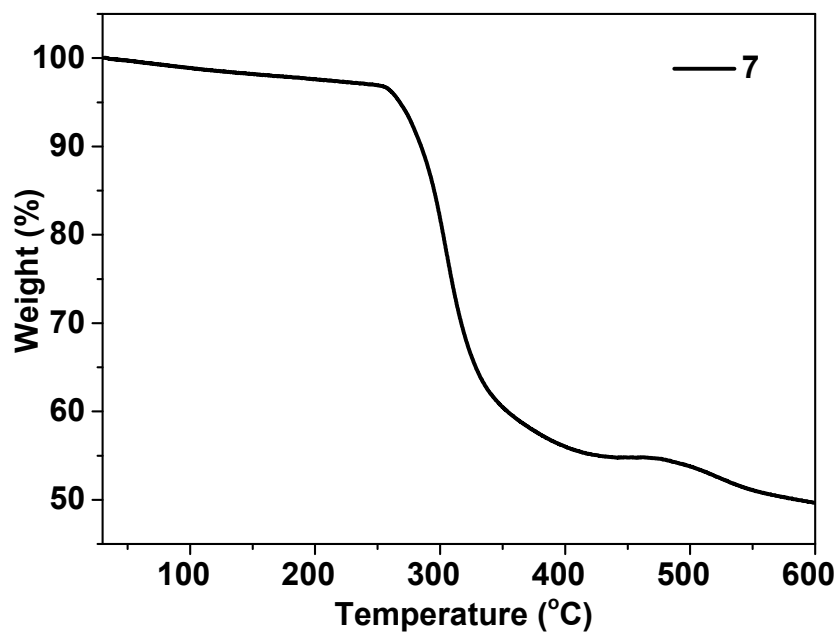

Figure S29. TG profile for 7.

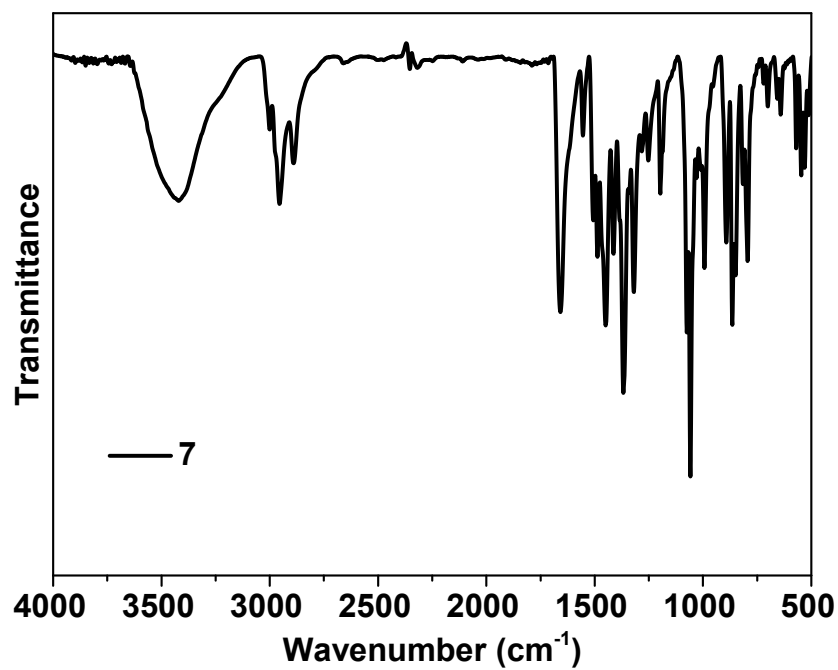

Figure S30. IR profile for 7.

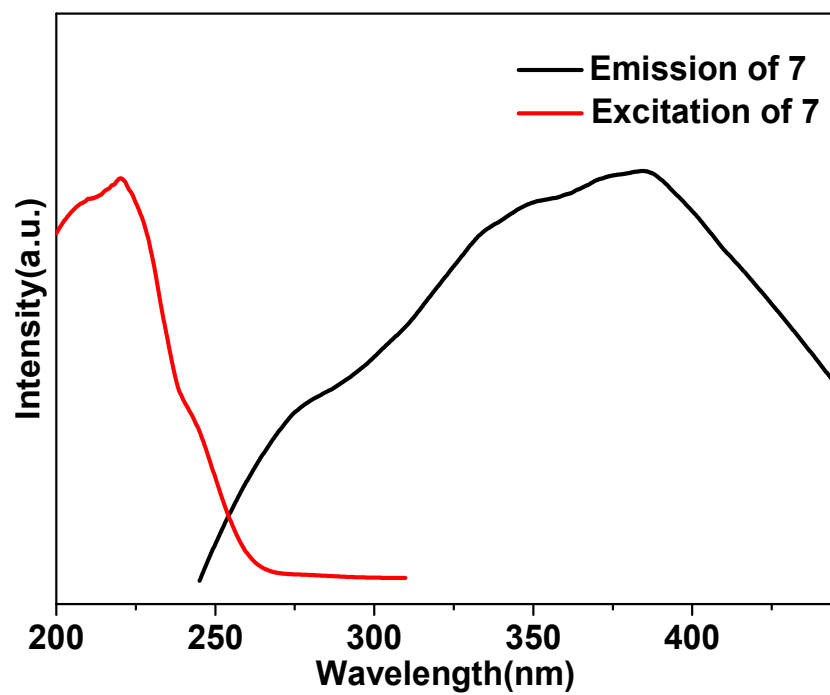

Figure S31. Fluorescent spectra for 7 in solid state at room temperature.

Table S1. Crystal data and structure refinement details for compounds **1** - **7**.

|                                     | <b>1</b>                                                                                           | <b>2</b>                                                                                                       | <b>3</b>                                                                                                                                       |
|-------------------------------------|----------------------------------------------------------------------------------------------------|----------------------------------------------------------------------------------------------------------------|------------------------------------------------------------------------------------------------------------------------------------------------|
| Formula                             | C <sub>66</sub> H <sub>42.82</sub> Cu <sub>4</sub> I <sub>2</sub> N <sub>12</sub> S <sub>4</sub> W | C <sub>49</sub> H <sub>49</sub> Cu <sub>4</sub> I <sub>2</sub> N <sub>11</sub> O <sub>3</sub> S <sub>4</sub> W | C <sub>66</sub> H <sub>125</sub> Br <sub>2</sub> Cl <sub>8</sub> Cu <sub>8</sub> N <sub>12</sub> O <sub>6</sub> S <sub>14</sub> W <sub>2</sub> |
| Molecular weight                    | 1823.99                                                                                            | 1660.04                                                                                                        | 2951.05                                                                                                                                        |
| Crystal system                      | Monoclinic                                                                                         | Monoclinic                                                                                                     | Monoclinic                                                                                                                                     |
| Space group                         | <i>C2/c</i>                                                                                        | <i>P2<sub>1</sub>/n</i>                                                                                        | <i>P2<sub>1</sub></i>                                                                                                                          |
| a (Å)                               | 45.2038(8)                                                                                         | 13.5150(4)                                                                                                     | 11.3261(7)                                                                                                                                     |
| b(Å)                                | 19.0461(3)                                                                                         | 17.6465(7)                                                                                                     | 13.5698(8)                                                                                                                                     |
| c(Å)                                | 28.9481(5)                                                                                         | 28.1103(9)                                                                                                     | 33.110(2)                                                                                                                                      |
| α (°)                               | 90                                                                                                 | 90                                                                                                             | 90                                                                                                                                             |
| β (°)                               | 114.7000(10)                                                                                       | 93.475(2)                                                                                                      | 90.112(3)                                                                                                                                      |
| γ (°)                               | 90                                                                                                 | 90                                                                                                             | 90                                                                                                                                             |
| V (Å <sup>3</sup> )                 | 22642.8(7)                                                                                         | 6691.8(4)                                                                                                      | 5088.7(5)                                                                                                                                      |
| Z                                   | 8                                                                                                  | 4                                                                                                              | 2                                                                                                                                              |
| F(000)                              | 7063                                                                                               | 3216                                                                                                           | 2926                                                                                                                                           |
| μ (mm <sup>-1</sup> )               | 7.861                                                                                              | 13.253                                                                                                         | 11.766                                                                                                                                         |
| D <sub>c</sub> (g/cm <sup>3</sup> ) | 1.070                                                                                              | 1.648                                                                                                          | 1.926                                                                                                                                          |
| R(int)                              | 0.0706                                                                                             | 0.0665                                                                                                         | 0.0450                                                                                                                                         |
| GOF on F <sup>2</sup>               | 1.060                                                                                              | 1.049                                                                                                          | 1.052                                                                                                                                          |
| R <sub>I</sub>                      | 0.0479                                                                                             | 0.0497                                                                                                         | 0.0467                                                                                                                                         |
| wR <sub>2</sub>                     | 0.1389                                                                                             | 0.1370                                                                                                         | 0.1346                                                                                                                                         |

|                                     | 4                                                                                                              | 5                                                                                                               | 6                                                                                              | 7                                                                                                 |
|-------------------------------------|----------------------------------------------------------------------------------------------------------------|-----------------------------------------------------------------------------------------------------------------|------------------------------------------------------------------------------------------------|---------------------------------------------------------------------------------------------------|
| Formula                             | C <sub>31</sub> H <sub>57</sub> C <sub>15</sub> Cu <sub>4</sub> N <sub>6</sub> O <sub>2</sub> S <sub>6</sub> W | C <sub>54</sub> H <sub>90</sub> Cu <sub>10</sub> I <sub>12</sub> Mo <sub>2</sub> N <sub>12</sub> S <sub>8</sub> | C <sub>30</sub> H <sub>51</sub> Cu <sub>3</sub> I <sub>4</sub> N <sub>6</sub> S <sub>4</sub> W | C <sub>30</sub> H <sub>51</sub> BrCl <sub>3</sub> Cu <sub>3</sub> N <sub>6</sub> S <sub>4</sub> W |
| Molecular weight                    | 1353.44                                                                                                        | 3513.93                                                                                                         | 1506.07                                                                                        | 1184.73                                                                                           |
| Crystal system                      | Orthorhombic                                                                                                   | Triclinic                                                                                                       | Cubic                                                                                          | Cubic                                                                                             |
| Space group                         | <i>P2<sub>1</sub>2<sub>1</sub>2<sub>1</sub></i>                                                                | <i>P1</i>                                                                                                       | <i>Pa3</i>                                                                                     | <i>Pa3</i>                                                                                        |
| a (Å)                               | 11.3271(5)                                                                                                     | 11.8390(7)                                                                                                      | 20.0824(3)                                                                                     | 19.6933(3)                                                                                        |
| b(Å)                                | 13.5211(6)                                                                                                     | 13.8931(8)                                                                                                      | 20.0824(3)                                                                                     | 19.6933(3)                                                                                        |
| c(Å)                                | 33.2108(16)                                                                                                    | 21.9722(14)                                                                                                     | 20.0824(3)                                                                                     | 19.6933(3)                                                                                        |
| α (°)                               | 90                                                                                                             | 82.885(4)                                                                                                       | 90                                                                                             | 90                                                                                                |
| β (°)                               | 90                                                                                                             | 77.181(4)                                                                                                       | 90                                                                                             | 90                                                                                                |
| γ (°)                               | 90                                                                                                             | 89.955(3)                                                                                                       | 90                                                                                             | 90                                                                                                |
| V (Å <sup>3</sup> )                 | 5086.4(4)                                                                                                      | 3495.5(4)                                                                                                       | 8099.3(4)                                                                                      | 7637.6(3)                                                                                         |
| Z                                   | 4                                                                                                              | 1                                                                                                               | 8                                                                                              | 8                                                                                                 |
| F(000)                              | 2688                                                                                                           | 1636                                                                                                            | 5680                                                                                           | 4672                                                                                              |
| μ (mm <sup>-1</sup> )               | 10.905                                                                                                         | 25.148                                                                                                          | 7.673                                                                                          | 6.159                                                                                             |
| D <sub>c</sub> (g/cm <sup>3</sup> ) | 1.767                                                                                                          | 1.669                                                                                                           | 2.470                                                                                          | 2.061                                                                                             |
| R(int)                              | 0.0607                                                                                                         |                                                                                                                 | 0.0654                                                                                         | 0.0898                                                                                            |
| GOF                                 | 1.059                                                                                                          | 0.976                                                                                                           | 1.063                                                                                          | 0.912                                                                                             |
| R <sub>I</sub> <sup>a</sup>         | 0.0636                                                                                                         | 0.0902                                                                                                          | 0.0311                                                                                         | 0.0612                                                                                            |
| wR <sub>2</sub> <sup>b</sup>        | 0.1468                                                                                                         | 0.2442                                                                                                          | 0.0958                                                                                         | 0.1989                                                                                            |

## Reference

- 1 C.-Q. Qiu, L.-Q. Li, S.-L. Yao, S.-J. Liu, H. Xu and T.-F. Zheng, *Polyhedron*, 2021, **199**, 115100.
- 2 A. Peuronen, A. I. Taponen, E. Kalenius, A. Lehtonen and M. Lahtinen, *Angew. Chem.-Int. Ed.*, 2023, **135**, e202215689.
